# Supplementary material for: NiFe2O4@SiO2–Cu as a novel and efficient magnetically recoverable nanocatalyst for regioselective synthesis of β-thiol-1,2,3-triazoles under benign conditions
Source: Royal Society of Chemistry journal article supplement (doi:10.1039/d3ra05433k), 2023-01-01
Supplement: d3ra05433k1.pdf [file d3ra05433k1.pdf]

## Supplementary Information

### **NiFe<sub>2</sub>O<sub>4</sub>@SiO<sub>2</sub>-Cu as a novel and efficient magnetically recoverable nanocatalyst for regioselective synthesis of $\beta$ -thiol-1,2,3-triazoles under benign conditions**

Ronak Eisavi\* and Seiran Ghadernejad

Department of Chemistry, Payame Noor Universtiy, P.O. BOX 19395-4697, Tehran, Iran

Email: roonak.isavi@gmail.com

*Spectral data of  $\beta$ -thiol-1,4-disubstituted-1,2,3-triazoles (1-11)b:*

2-Phenyl-2-(4-phenyl-1*H*-1,2,3-triazol-1-yl) ethane-1-thiol (1b)

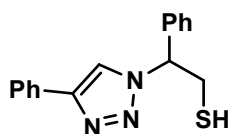

White solid: m.p. 122-124 °C, **FT-IR (KBr):**  $\nu/\text{cm}^{-1}$  3371, 3085, 3026, 2927, 2365, 1584, 1450, 1270, 1029, 762, 695; **<sup>1</sup>H NMR (500 MHz, CDCl<sub>3</sub>)**  $\delta$  7.78-7.71 (m, 2H, Ar-H), 7.44-7.23 (m, 9H, Ar-H) 5.69 (dd, *J* = 7, 4.5 Hz, 1H, CHN), 4.63 (dd, *J* = 12.5, 5 Hz, 1H, CH<sub>2</sub>), 4.23 (dd, *J* = 15, 5 Hz, 1H, CH<sub>2</sub>), 3.63 (bs, 1H, SH); **<sup>13</sup>C NMR (125 MHz, CDCl<sub>3</sub>)**  $\delta$  146.7 (=CN), 135.0 (NCH=), 128.1, 127.8, 127.2, 126.1, 124.7, 119.5 (10  $\times$  ArC), 66.2 (CHCH<sub>2</sub>), 28.6 (CH<sub>2</sub>). HRMS (EI) *m/z* calcd for C<sub>16</sub>H<sub>15</sub>N<sub>3</sub>S 281.0987, found 281.0985.

1-Phenoxy-3-(4-phenyl-1*H*-1,2,3-triazol-1-yl)propane-2-thiol (2b)

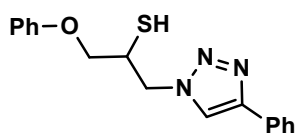

Milky solid: m.p. 113-114 °C, **FT-IR (KBr):**  $\nu/\text{cm}^{-1}$  3302, 3086, 2919, 2873, 2365, 1587, 1638, 1599, 1497, 1474, 1466, 1303, 1044, 764, 752, 712, 691; **<sup>1</sup>H NMR (500 MHz, CDCl<sub>3</sub>)**  $\delta$  7.86 (s, 1H, NCH=C), 7.67-7.65 (m, 2H, Ar-H<sub>o</sub>), 7.35-7.31 (m, 2H, OAr-H<sub>m</sub>), 7.29-7.26 (m, 3H, Ar-H<sub>m,p</sub>), 7.00-6.87 (m, 3H, OAr-H<sub>o,p</sub>), 4.96 (bs, 1H, SH), 4.67 (dd, *J* = 13, 5 Hz, 1H,

CH<sub>2</sub>O), 4.52 (dd, J = 13, 5 Hz, 1H, CH<sub>2</sub>O), 4.47 (dd, 1H, J = 12.5, 5 Hz, CH<sub>2</sub>N), 4.08 (dd, 1H, J = 12.5, 5 Hz, CH<sub>2</sub>N), 4.05-3.72 (m, 1H, CHS); <sup>13</sup>C NMR (125 MHz, CDCl<sub>3</sub>) δ 157.1 (=CN), 146.53, 129.1 (2 × ArC), 128.6, 128.5, 127.8, 127.1, 124.6, 120.5, 120.4 (10 × ArCH), 113.5 (NCH=), 67.8 (CH<sub>2</sub>O), 52.2 (CH<sub>2</sub>N), 28.6 (CHS). HRMS (EI) *m/z* calcd for C<sub>17</sub>H<sub>17</sub>N<sub>3</sub>OS 311.1092, found 311.1092.

1-Chloro-3-(5-phenyl-1H-1,2,3-triazol-1-yl)propane-2-thiol (3b)

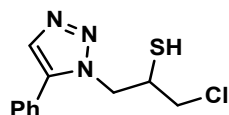

Mint white solid: mp. 154-157 °C **FT-IR (KBr):**  $\nu/\text{cm}^{-1}$  3690, 3100, 2920, 2363, 2344, 1561, 1441, 1364, 1045, 764, 692, 668. <sup>1</sup>H NMR (500 MHz, CDCl<sub>3</sub>) δ 7.93 (s, 1H, NCH=C), 7.88-7.23 (m, 5H, Ar-H), 4.61-4.41 (m, 2H, CH<sub>2</sub>N), 4.39-4.31 (m, 1H, CH<sub>2</sub>Cl), 4.00-3.94 (m, 1H, CH<sub>2</sub>Cl), 3.90-3.37 (m, 1H, CHS), 2.07 (bs, 1H, SH); <sup>13</sup>C NMR (125 MHz, CDCl<sub>3</sub>) δ 148.0 (=CN), 130.1 (ArC, NCH=), 128.9, 128.4, 125.7, 117.6 (5 × ArCH), 55.9 (CH<sub>2</sub>N), 34.4 (CH<sub>2</sub>Cl), 29.6 (CHS). HRMS (EI) *m/z* calcd for C<sub>11</sub>H<sub>12</sub>ClN<sub>3</sub>S 253.0441, found 253.0442.

1-(4-phenyl-1H-1,2,3-triazol-1-yl)butane-2-thiol (4b)

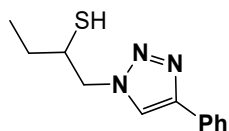

White solid: mp. 104-106 °C, **FT-IR (KBr):**  $\nu/\text{cm}^{-1}$  3692, 3139, 2958, 2873, 2366, 2345, 1585, 1439, 1230, 1072, 765, 694; <sup>1</sup>H NMR (500 MHz, CDCl<sub>3</sub>) δ 7.83 (s, 1H, NCH=C), 7.68-7.23 (m, 5H, Ar-H), 4.49 (dd, J = 14, 5 Hz, 1H, CH<sub>2</sub>N), 4.24 (dd, J = 14, 8 Hz, 1H, CH<sub>2</sub>N), 4.09-4.04 (m, 1H, CHS), 3.43 (bs, 1H, SH), 1.61-1.55 (m, 2H, CH<sub>2</sub>), 1.06 (t, J = 7.5 Hz, 3H, CH<sub>3</sub>); <sup>13</sup>C NMR (125 MHz, CDCl<sub>3</sub>) δ 147.3 (=CN), 130.3 (NCH=), 128.7, 128.0, 125.5, 121.1 (6 × ArC), 71.7 (CH<sub>2</sub>N), 55.9 (CHS), 27.4 (CH<sub>2</sub>), 9.8 (CH<sub>3</sub>). HRMS (EI) *m/z* calcd for C<sub>12</sub>H<sub>15</sub>N<sub>3</sub>S 233.0987, found 233.0986.

1-Isopropoxy-3-(4-phenyl-1H-1,2,3-triazol-1-yl)propane-2-thiol (5b)

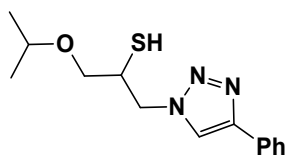

Yellow solid: mp. 74-75 °C, **FT-IR (KBr)**:  $\nu/\text{cm}^{-1}$  3177, 2968, 2875, 2369, 2345, 1583, 1460, 1444, 1366, 1071, 767, 702;  **$^1\text{H NMR}$  (500 MHz,  $\text{CDCl}_3$ )**  $\delta$  7.86 (s, 1H, NCH=C), 7.67–7.65 (m, 2H, Ar-H), 7.33–7.23 (m, 3H, Ar-H), 4.53 (dd,  $J = 14, 4$  Hz, 1H,  $\text{CH}_2\text{N}$ ), 4.34 (dd,  $J = 14, 7.5$  Hz, 1H,  $\text{CH}_2\text{N}$ ), 4.21-4.16 (m, 2H,  $\text{OCH}_2$ ), 3.58-3.51 (m, 1H, CHO), 3.46-3.35 (m, 2H, CHS overlapped with SH), 1.11 (d,  $J = 5$  Hz, 6H,  $2 \times \text{CH}_3$ );  **$^{13}\text{C NMR}$  (125 MHz,  $\text{CDCl}_3$ )**  $\delta$  147.9 (=CN), 130.3 (NCH=), 128.7, 128.0, 125.5, 121.4 ( $6 \times \text{ArC}$ ), 72.3 (CHO), 69.2 ( $\text{OCH}_2$ ), 69.1 ( $\text{CH}_2\text{N}$ ), 53.4 (CHS), 21.9 ( $2 \times \text{CH}_3$ ). HRMS (EI)  $m/z$  calcd for  $\text{C}_{14}\text{H}_{19}\text{N}_3\text{OS}$  277.1249, found 277.1247.

2-(4-Phenyl-1*H*-1,2,3-triazol-1-yl)cyclohexane-1-thiol (6b)

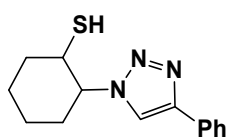

Pale green solid: mp. 156-159 °C, **FT-IR (KBr)**:  $\nu/\text{cm}^{-1}$  3305, 3094, 2936, 2853, 2364, 1586, 1440, 1236, 1055, 766, 698;  **$^1\text{H NMR}$  (500 MHz,  $\text{CDCl}_3$ )**  $\delta$  7.83 (s, 1H, NCH=C), 7.63–7.25 (m, 5H, Ar-H), 4.12–4.04 (m, 1H, CHN), 3.57–2.94 (m, 1H, CHS), 2.04-1.22 (m,  $4 \times \text{CH}_2$  overlapped with 1H, SH);  **$^{13}\text{C NMR}$  (125 MHz,  $\text{CDCl}_3$ )**  $\delta$  146.6 (=CN), 132.4 (NCH=), 130.2, 128.6, 127.9, 125.4, 119.8 ( $6 \times \text{ArC}$ ), 72.5 (CHN), 67.2 (CHS), 28.6 (CHS), 33.8, 31.5, 24.8, 24.0 ( $4 \times \text{CH}_2$ ). HRMS (EI)  $m/z$  calcd for  $\text{C}_{14}\text{H}_{17}\text{N}_3\text{S}$  259.1143, found 259.1143.

1-(Allyloxy)-3-(4-phenyl-1*H*-1,2,3-triazol-1-yl)propane-2-thiol (7b)

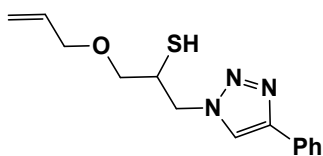

Cream solid: mp. 70 °C, **FT-IR (KBr)**:  $\nu/\text{cm}^{-1}$  3233, 3141, 2930, 2872, 2366, 1590, 1438, 1350, 1230, 1000, 767, 696;  **$^1\text{H NMR}$  (500 MHz,  $\text{CDCl}_3$ )**  $\delta$  7.85 (s, 1H, NCH=C), 7.55-7.23 (m, 5H, Ar-H), 5.80-5.87 (m, 1H, =CH), 5.22 (dt,  $J = 17, 1.2$  Hz, 1H,  $\text{C}=\text{CH}_2$ ), 5.14 (dt,  $J = 10, 1.2$  Hz, 1H,  $\text{C}=\text{CH}_2$ ), 4.55-4.50 (m, 2H,  $\text{CH}_2\text{O}$ ), 4.35 (dd,  $J = 15, 7$  Hz, 1H,  $\text{CH}_2\text{N}$ ), 4.26-4.23 (m, 1H,  $\text{CH}_2\text{N}$ ), 4.00-3.88 (m, 2H,  $\text{OCH}_2$ ), 3.48-3.41 (m, 1H, CHS), 2.91 (bs, 1H, SH);  **$^{13}\text{C NMR}$  (125 MHz,  $\text{CDCl}_3$ )**  $\delta$  147.1 (=CN), 134.2 (NCH=), 130.2 (=CH), 128.7, 128.0, 125.5, 121.5 ( $6 \times \text{ArC}$ ), 117.4 (=CH<sub>2</sub>), 72.3 ( $\text{OCH}_2$ ), 71.2 ( $\text{CH}_2\text{O}$ ), 69.0 ( $\text{CH}_2\text{N}$ ), 53.4 (CHS). HRMS (EI)  $m/z$  calcd for  $\text{C}_{14}\text{H}_{17}\text{N}_3\text{OS}$  275.1092, found 275.1094.

2-Mercapto-3-(4-phenyl-1*H*-1,2,3-triazol-1-yl)propyl methacrylate (8b)

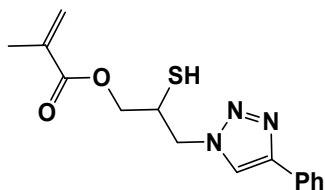

Milky solid: mp. 86-92 °C, **FT-IR (KBr):**  $\nu/\text{cm}^{-1}$  3000, 2925, 2367, 1719, 1593, 1438, 1294, 1097, 762, 695; **<sup>1</sup>H NMR (300 MHz, CDCl<sub>3</sub>):**  $\delta$  7.86 (s, 1H, NCH=C), 7.66-7.64 (m, 2H, Ar-H), 7.34-7.25 (m, 3H, Ar-H), 6.10 (d,  $J = 10$  Hz, 1H, =CH<sub>2</sub>), 5.93 (d,  $J = 10$  Hz, 1H, =CH<sub>2</sub>), 4.48-4.12 (m, 2H, OCH<sub>2</sub>), 3.57 (m, 2H, CH<sub>2</sub>N), 3.66 (bs, 1H, SH), 3.33-3.32 (m, 1H, CSH), 2.05 (s, 3H, CH<sub>3</sub>); **<sup>13</sup>C NMR (125 MHz, CDCl<sub>3</sub>):**  $\delta = 161.6$  (C=O), 147.3 (=CN), 135.7 (C=), 128.9 (NCH=), 128.8, 128.2, 125.5, 121.6 (6  $\times$  ArC), 70.6 (OCH<sub>2</sub>), 63.6 (CH<sub>2</sub>N), 53.0 (CHS), 18.3 (CH<sub>3</sub>). HRMS (EI)  $m/z$  calcd for C<sub>15</sub>H<sub>17</sub>N<sub>3</sub>O<sub>2</sub>S 303.1042, found 303.1045.

2-(4-Cyclohexyl-1*H*-1,2,3-triazol-1-yl)-2-phenylethane-1-thiol (9b):

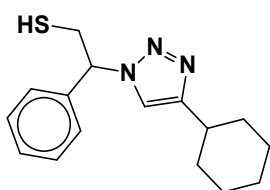

White solid: m.p. 125-128 °C, **FT-IR (KBr):**  $\nu/\text{cm}^{-1}$  3233, 3117, 3061, 2923, 2849, 1448, 1067, 889, 756, 697; **<sup>1</sup>H NMR (500 MHz, CDCl<sub>3</sub>):**  $\delta$  7.60 (s, 1H, NCH=C), 7.42-7.26 (m, 5H, Ar-H), 5.68 (dd,  $J = 8.7, 4.8$  Hz, 1H, NCHCH<sub>2</sub>), 4.40-4.28, 4.15-4.03 (2 m, 2H, CH<sub>2</sub>S), 3.32 (t,  $J = 5.9$  Hz, 1H, SH), 2.76-2.68 (m, 1H, CH<sub>2</sub>CHCH<sub>2</sub>), 1.76-1.65 (m, 4H, 2  $\times$  CH<sub>2</sub>CH<sub>2</sub>CH), 1.43-1.36 (m, 4H, 2  $\times$  CH<sub>2</sub>CH<sub>2</sub>CH), 1.27-1.18 [m, 2H, (CH<sub>2</sub>)<sub>2</sub>CH<sub>2</sub>(CH<sub>2</sub>)<sub>2</sub>]. **<sup>13</sup>C NMR (125 MHz, CDCl<sub>3</sub>):**  $\delta = 153.9$  (NCCH), 138.5 (ArC), 129.7, 129.3, 128.1 (5  $\times$  ArCH), 120.9 (NCCH), 64.7 (NCHCH<sub>2</sub>), 53.3 (CH<sub>2</sub>S), 36.1 (CH<sub>2</sub>CHCH<sub>2</sub>), 33.8, 26.9, 26.8 [(CH<sub>2</sub>)<sub>5</sub>]; HRMS (EI)  $m/z$  calcd for C<sub>16</sub>H<sub>21</sub>N<sub>3</sub>S 287.1456, found 287.1455.

(1-(2-Mercapto-1-phenylethyl)-1*H*-1,2,3-triazol-4-yl)methanol (10b)

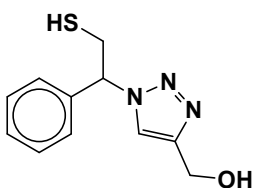

Colorless solid. m.p. 101-105 °C, **FT-IR (KBr):**  $\nu/\text{cm}^{-1}$  3340, 3167, 2932, 2893, 1454, 1234, 1119, 1084, 1011, 849, 795, 702. **<sup>1</sup>H NMR (500 MHz, CDCl<sub>3</sub>):**  $\delta$  7.62 (s, 1H,

NCH=C), 7.37-7.28 (m, 5H, Ar-H), 5.68 (dd,  $J = 8.7, 4.8$  Hz, 1H, NCHCH<sub>2</sub>), 4.52 (s, 2H, CH<sub>2</sub>O), 4.38-4.30, 4.13-4.02 (2 m, 2H, CH<sub>2</sub>S), 3.76 (bs, 1H, OH), 3.32 (t,  $J = 5.9$  Hz, 1H, SH), **<sup>13</sup>C NMR (125 MHz, CDCl<sub>3</sub>):**  $\delta = 147.1$  (=CN), 130.1 (ArC), 128.5, 128.0, 125.7 ( $5 \times$  ArCH), 121.3 (=CHN), 71.8 (CHN), 55.7 (CH<sub>2</sub>O), 27.3 (CH<sub>2</sub>S). HRMS (EI)  $m/z$  calcd for C<sub>11</sub>H<sub>13</sub>N<sub>3</sub>OS 235.0779, found 235.0781.

2-(4-(4-Methoxyphenyl)-1H-1,2,3-triazol-1-yl)-2-phenylethane-1-thiol (11b)

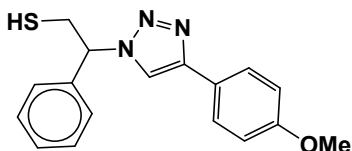

White solid: m.p. 130-132°C, **FT-IR (KBr):**  $\nu/\text{cm}^{-1}$  3371, 3085, 3026, 2927, 2365, 1584, 1450, 1270, 1074, 1041, 1029, 762, 695; **<sup>1</sup>H NMR (500 MHz, CDCl<sub>3</sub>)**  $\delta$  7.76-7.71 (m, 3H, Ar-H), 7.44-7.21 (m, 7H, Ar-H) 5.71 (dd,  $J = 7, 4.5$  Hz, 1H, CHN), 4.15 (s, 3H, OCH<sub>3</sub>), 3.76 (dd,  $J = 12.5, 5$  Hz, 1H, CH<sub>2</sub>), 3.37 (dd,  $J = 15, 5$  Hz, 1H, CH<sub>2</sub>), 2.75 (bs, 1H, SH); **<sup>13</sup>C NMR (125 MHz, CDCl<sub>3</sub>)**  $\delta$  146.6 (=CN), 135.0 (NCH=), 128.1, 127.7, 127.2, 126.1, 124.7, 119.1 ( $10 \times$  ArC), 66.2 (CHN), 58.26 (OCH<sub>3</sub>), 28.6 (CH<sub>2</sub>S). HRMS (EI)  $m/z$  calcd for C<sub>17</sub>H<sub>17</sub>N<sub>3</sub>OS 311.1092, found 311.1095.
